# Supplementary material for: Vitamin B12 deficiency-induced pseudothrombotic microangiopathy without macrocytosis presenting with acute renal failure: a case report
Source: PubMed Central journal article supplement (PMC6169071; doi:10.1186/s13256-018-1815-8), 2018-10-03

**September 2017**

22<sup>nd</sup>

Blood smear showed **hemolysis, neutropenia and impaired renal function**

The patient **presented to emergency department** because **severe anemia** (Hb 4.3 g/dl)

23<sup>rd</sup>

24<sup>th</sup>

Renal function improved, hemolytic anemia and neutropenia persisted with rapid decrease of platelet count up to  $46 \times 10^9/L$

**Blood transfusions** and i.v. hydration were performed

25<sup>th</sup>

30<sup>th</sup>

Hematological improvement with consensual decrease of hemolysis index

**IM vitamin B<sub>12</sub> therapy was started** because of extremely low plasma levels ( $< 36.9 \text{ pmol/L}$ )

**October 2017**

10<sup>th</sup>

Outpatient follow-up with resolution of anemia, neutropenia and thrombocytopenia

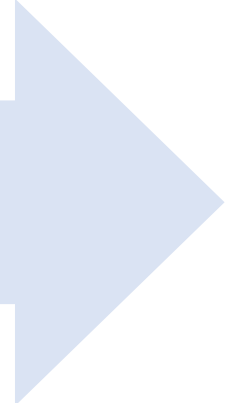

Supplement: 13256_2018_1815_MOESM1_ESM.pdf [file 13256_2018_1815_MOESM1_ESM.pdf]
